# Supplementary material for: Hematological and cytochemical characteristics of peripheral blood cells in the argus snakehead (Ophiocephalus argus Cantor)
Source: PeerJ. 2021 Apr 26;9:e11234. doi: 10.7717/peerj.11234 (PMC8083180; doi:10.7717/peerj.11234)
Supplement: File S1 — The length and width of erythrocytes were measured in four types of leukocytes (neutrophils, monocytes, large lymphocytes, and small lymphocytes) and thrombocytes in male and female argus snakehead specimens. The cell length and width of the erythrocyte nucleus was also measured. Twenty cells of each type were randomly selected for measurement, the mean value was taken, and the standard deviation was calculated. All the data were statistically analyzed between males and females and between various cells. [file peerj-09-11234-s001.xlsx]

## Sheet: Sheet1
	Cell length and width of female argus snakehead
	Erythrocytes		(nuclei)		Neutrophils		Monocytes		Large lymphocytes		Small lymphocytes		Thrombocytes
	Length	Width	Length	Width	Length	Width	Length	Width	Length	Width	Length	Width	Length	Width
	14.2155	10.2612	8.36321	4.95728	15.9453	13.4291	17.3913	16.0928	9.65374	9.57509	7.82609	6.52174	15.9512	6.22514
	15.9631	10.1128	9.33518	4.70289	14.2155	12.4503	14.609	13.9198	7.99338	6.46351	5.28936	6.41949	18.9418	6.63667
	14.84	10.9475	8.30651	4.36951	15.0739	14.609	17.7411	16.7828	8.30651	7.96209	4.0085	4.10173	18.8529	7.07775
	12.6087	10.7647	7.40408	4.0085	18.266	17.8737	15.9631	14.9732	8.95272	8.69565	4.6218	4.30413	17.0953	7.93404
	14.0213	10.3712	7.83816	4.10173	18.7159	16.9565	14.4528	13.6524	8.96327	7.77763	8.01699	6.79152	27.4465	6.97009
	14.0213	10.525	7.60559	5.56793	13.5273	11.3794	18.3486	15.2112	10.525	8.96327	5.91368	5.8494	17.5912	6.17942
	14.3412	9.62432	9.38567	3.58531	20.3792	18.9916	14.8591	13.2234	7.98155	7.83816	6.87452	6.22514	18.7007	7.83816
	14.3478	10.4438	9.17175	4.78261	17.2	15.9868	16.1573	14.7121	10.8696	8.92099	5.83322	4.68275	21.5864	7.74108
	14.1955	10.7998	8.3519	4.10173	20.4394	18.7159	17.6556	12.7281	15.6763	14.8082	7.98155	6.80542	21.3221	8.2723
	15.0927	9.83801	8.92099	4.0085	17.0066	14.7121	15.8263	13.6455	14.4528	14.3939	6.87452	5.66887	16.9565	5.83322
	14.1087	11.4868	8.80368	3.13526	21.014	20.0755	13.3089	12.2975	11.3043	10.507	7.83816	7.69209	20.3792	7.69209
	14.0348	9.53553	8.39705	3.71478	18.1414	13.0435	16.5275	15.5674	16.9175	15.1863	5.2535	4.28211	18.6754	7.17062
	16.1339	11.6014	8.01699	5.22514	15.8263	13.6455	17.134	16.3666	13.5063	9.40579	8.56422	5.83322	16.1104	6.53622
	13.9198	10.4529	7.44228	5.089	15.3164	14.3544	17.051	16.3377	11.3794	8.54212	7.48028	7.37851	18.6754	7.59315
	15.5674	9.72203	10.516	4.70289	15.7064	12.927	18.6754	15.267	9.33549	8.12246	8.01699	7.83816	18.2609	7.3913
	10.7383	13.8722	9.04724	5.23548	13.6455	11.2204	20.6602	15.9512	12.7873	8.57525	4.95728	3.58531	18.7764	6.14876
	15.4087	8.44195	9.91457	4.95728	16.3896	13.6455	18.7764	15.3719	12.0569	8.95272	7.01066	6.14876	19.5652	6.57946
	13.6455	10.1408	8.57525	4.47636	15.2422	14.9921	17.156	14.1555	9.53553	8.92099	8.92099	8.60826	27.044	7.83816
	15.0739	9.91457	8.36321	5.41949	15.9216	14.1955	15.421	14.5311	11.4786	11.0678	7.28829	5.65217	17.413	6.08696
	14.3016	9.80914	10.4529	5.91368	14.84	13.3939	14.3412	11.4373	15.9868	13.6524	6.52173	5.66887	14.1555	6.14876
Mean	14.329	10.4333	8.71061	4.60277	16.6406	14.8299	16.6028	14.6112	11.3831	9.91656	6.75462	6.00288	19.175	6.99467
SD	1.15909	1.04844	0.877443	0.703598	2.16486	2.44969	1.76863	1.4254	2.66939	2.49608	1.36417	1.3063	3.19439	0.738471
	Cell length and width of male argus snakehead
	Erythrocytes		(nuclei)		Neutrophils		Monocytes		Large lymphocytes		Small lymphocytes		Thrombocytes
	Length	Width	Length	Width	Length	Width	Length	Width	Length	Width	Length	Width	Length	Width
	12.6983	11.2204	7.42957	3.31121	17.3913	14.8082	15.1863	14.7634	9.80914	8.24942	7.40408	6.53622	14.407	6.97009
	12.3129	11.4786	6.10246	2.6087	15.4822	14.3129	14.3742	13.1589	9.24361	9.22313	7.44228	7.01066	13.0724	7.3913
	12.8463	12.0569	6.22514	3.50533	10.9734	8.57525	14.5116	13.8176	11.3377	10.178	6.57946	6.52174	11.1359	5.3072
	12.0804	10.516	7.02413	3.74014	12.6087	10.0377	15.0927	14.0819	11.1359	10.7998	7.01066	6.08696	15.8681	6.57946
	13.029	11.6664	8.26087	2.6087	14.5116	14.407	15.6763	15.3164	15.8263	10.7069	6.46351	6.14876	13.2507	6.52174
	13.8176	10.516	8.69565	3.74014	15.7064	15.4394	13.3018	12.4503	12.676	11.3043	6.52174	6.08696	22.5501	8.39705
	14.5766	8.96327	6.10246	3.91304	15.2732	14.3478	16.0928	15.2732	11.0678	8.30651	7.98155	7.01066	12.1817	6.52174
	13.913	10	6.14876	4.43393	17.7037	16.1807	14.5831	11.9387	13.2234	10.471	7.83816	6.80542	12.3588	7.76363
	13.5412	9.22313	6.17942	4.0085	10.3072	8.95272	14.3478	14.0819	10.6942	10.507	6.33053	5.65217	17.9265	7.69209
	12.6387	8.2723	8.3519	3.07438	14.0819	13.3373	17.3096	14.7634	14.0213	12.2513	7.3913	6.95652	15.0927	7.50551
	12.4503	11.0078	8.08471	2.64468	14.3939	13.6455	14.5116	12.8757	9.8572	9.65374	6.87452	6.52174	14.5831	7.01066
	14.0819	9.65374	6.80542	3.71478	12.9051	10.9734	17.8261	16.556	11.8114	9.22313	6.27052	5.8072	17.0953	8.44195
	12.2049	10.471	8.44195	3.16527	14.789	12.6087	14.9416	13.9741	10.516	8.12241	8.16882	6.74964	14.0011	6.22514
	11.9387	9.72203	7.98155	2.5352	17.5267	14.9921	15.3719	14.0213	11.577	9.65374	7.74108	6.33653	13.4853	4.78261
	12.6162	11.4373	6.27052	4.95728	18.9816	15.6823	17.1119	15.7545	10.9992	8.74983	7.83816	7.82609	14.8719	7.40408
	13.0507	10.0094	7.40408	3.39576	17.0953	14.8082	16.1104	15.3164	8.96327	8.24942	7.87425	7.59315	17.2439	5.23548
	14.5311	9.91457	6.87452	3.68925	15.4394	14.1555	16.3896	14.642	13.2019	10.1871	3.91304	3.47816	14.84	7.14876
	14.7698	10.471	7.01066	3.07438	15.2112	14.0011	14.8082	13.913	10.4348	9.17175	5.71867	5.49961	14.0348	7.83816
	13.0435	11.7391	6.53622	5.71867	16.5275	13.9402	18.6095	15.0676	15.9453	14.6671	5.21739	4.36951	12.0255	5.3072
	11.994	11.0848	8.36321	3.13526	17.3587	15.7605	14.1087	14.0213	16.5275	16.5275	4.80233	4.36877	13.9198	7.41408
Mean	13.1068	10.4712	7.21466	3.54873	15.2134	13.5483	15.5133	14.2894	11.9434	10.3101	6.7691	6.16832	14.6972	6.8729
SD	0.879999	0.984124	0.900209	0.787482	2.20819	2.16382	1.3365	1.10497	2.16752	2.08732	1.1261	1.06171	2.50354	1.03042
