# Supplementary material for: Hematological and cytochemical characteristics of peripheral blood cells in the argus snakehead (Ophiocephalus argus Cantor)
Source: PeerJ. 2021 Apr 26;9:e11234. doi: 10.7717/peerj.11234 (PMC8083180; doi:10.7717/peerj.11234)
Supplement: File S3 — The total number of blood cells was calculated using a hemocytometer under an Olympus BX61 microscope. The number of erythrocytes, leukocytes, and thrombocytes were calculated according to the proportions of these cells counted in the Wright’s blood smears. The mean value and the standard deviation were calculated. All the data were statistically analyzed between males and females and between various cells. [file peerj-09-11234-s003.xlsx]

## Sheet: Sheet1
	①Blood cell proportion of female argus snakehead					①Blood cell proportion of male argus snakehead					②Blood cell proportion of female argus snakehead					②Blood cell proportion of male argus snakehead					③Blood cell proportion of female argus snakehead					③Blood cell proportion of male argus snakehead
	Erythrocytes	Leukocytes	Thrombocytes	Sum		Erythrocytes	Leukocytes	Thrombocytes	Sum		Erythrocytes	Leukocytes	Thrombocytes	Sum		Erythrocytes	Leukocytes	Thrombocytes	Sum		Erythrocytes	Leukocytes	Thrombocytes	Sum		Erythrocytes	Leukocytes	Thrombocytes	Sum
	108	2	1	111		78	1	1	80		86	2	0	88		148	4	1	153		75	1	2	78		81	4	2	87
	66	1	2	69		80	3	2	85		102	3	1	106		156	7	2	165		95	5	2	102		104	1	3	108
	110	6	0	116		85	1	0	86		108	3	2	113		112	3	1	116		69	2	0	71		117	4	0	121
	120	9	0	129		21	2	0	23		102	3	1	106		85	3	1	89		93	2	3	98		109	3	2	114
	92	2	0	94		97	3	0	100		93	1	0	94		36	2	0	38		78	3	0	81		108	4	0	112
	104	2	1	107		105	4	0	109		68	2	1	71		70	4	1	75		60	3	1	64		73	2	1	76
	105	4	2	111		110	2	1	113		117	4	1	122		68	2	2	72		74	2	2	78		52	1	1	54
	57	1	1	59		59	3	0	62		96	4	2	102		136	5	1	142		82	3	1	86		110	4	1	115
	98	3	1	102		92	1	2	95		99	1	2	102		100	5	0	105		65	3	1	69		135	4	2	141
	116	2	3	121		119	6	1	126		71	2	1	74		59	3	2	64		73	1	4	78		107	2	1	110
	E/S	L/S	T/S			E/S	L/S	T/S			E/S	L/S	T/S			E/S	L/S	T/S			E/S	L/S	T/S			E/S	L/S	T/S
	0.972973	0.018018	0.00900901	1		0.975	0.0125	0.0125	1		0.977273	0.0227273	0	1		0.96732	0.0261438	0.00653595	0.9999	·	0.961538	0.0128205	0.025641	0.9999		0.931034	0.045977	0.0229885	1
	0.9565	0.0145	0.029	1		0.941176	0.0352941	0.0235294	1		0.962264	0.0283019	0.00943396	1		0.945455	0.0424242	0.0121212	1		0.931373	0.0490196	0.0196078	1		0.962963	0.00925926	0.0277778	1.0001
	0.9483	0.0517	0	1		0.988372	0.0116279	0	1		0.955752	0.0265487	0.0176991	1		0.965517	0.0258621	0.00862069	1		0.971831	0.028169	0	1		0.966942	0.0330579	0	1
	0.930233	0.0697674	0	1		0.913043	0.0869565	0	1		0.962264	0.0283019	0.00943396	1		0.955056	0.0337079	0.011236	1		0.94898	0.0204082	0.0306122	1		0.95614	0.0263158	0.0175439	0.9999
	0.978723	0.0212766	0	1		0.97	0.03	0	1		0.989362	0.0106383	0	1		0.947368	0.0526316	0	1		0.962963	0.037037	0	1		0.964286	0.0357143	0	1
	0.971963	0.0186916	0.00934579	1		0.963303	0.0366972	0	1		0.957746	0.028169	0.0140845	1		0.933333	0.0533333	0.0133333	0.9999		0.9375	0.046875	0.015625	0.9999		0.960526	0.0263158	0.0131579	1
	0.945946	0.036036	0.018018	0.9999		0.973451	0.0176991	0.00884956	1		0.959016	0.0327869	0.00819672	1		0.944444	0.0277778	0.0277778	1		0.948718	0.025641	0.025641	0.9999		0.962963	0.0185185	0.0185185	1
	0.966102	0.0169492	0.0169492	0.9999		0.951613	0.0483871	0	1		0.941176	0.0392157	0.0196078	1		0.957746	0.0352113	0.00704225	0.9999		0.953488	0.0348837	0.0116279	1		0.956522	0.0347826	0.00869565	1
	0.960784	0.0294118	0.00980392	1		0.968421	0.0105263	0.0210526	1		0.970588	0.00980392	0.0196078	1		0.952381	0.047619	0	1		0.942029	0.0434783	0.0144928	1		0.957447	0.0283688	0.0141844	1
	0.958678	0.0165289	0.0247934	1		0.944444	0.047619	0.00793651	0.9999		0.959459	0.027027	0.0135135	1		0.921875	0.046875	0.03125	1.0001		0.935897	0.0128205	0.0512821	1		0.972727	0.0181818	0.00909091	1
Mean	0.95902	0.029288	0.0116919	1		0.958882	0.0337307	0.00738681	1		0.96349	0.0253521	0.0111577	1.0001		0.94905	0.0391586	0.0117917	1		0.949432	0.0311153	0.019453	1		0.959155	0.0276492	0.0131958	1
	①The blood cell counts of female argus snakehead																Sum		♀Mean	Mean×5	(104/mm3)		SD		Blood cell proportion of female argus snakehead
	2	4	3	3	2	3	7	2	2	3	4	2	1	0	2	1	41	①	61.5	307.5		3.08	0.163571			①	②	③	Mean
	5	4	3	1	4	5	6	5	9	5	5	4	3	4	2	3	68	②	65	330		3.3	3.09333		E/S	0.959	0.9635	0.9494	0.9573
	3	3	1	5	1	3	3	2	5	4	2	8	4	7	6	3	60	③	58	290		2.9			L/S	0.0293	0.0254	0.0311	0.0286
	2	3	2	1	1	0	3	0	1	2	3	5	7	2	2	6	40		①	②	③	Mean	SD		T/S	0.0117	0.0112	0.0195	0.0141333
	4	2	3	7	5	3	6	4	1	3	2	6	8	3	1	2	60	Erythrocytes	2.94	3.16	2.78	2.96	0.155778
	3	4	2	1	6	5	3	8	7	2	1	0	6	5	2	4	59	Leukocytes	8.79	9.44	8.29	8.84	0.470815		Blood cell proportion of male argus snakehead
	7	2	1	6	3	4	2	8	1	5	6	3	5	4	3	2	62	Thrombocytes	4.34	4.65	4.09	4.36	0.229056			①	②	③	Mean
	6	3	4	2	4	7	8	6	3	6	5	5	4	6	7	7	83								E/S	0.9589	0.949	0.9592	0.9557
	3	6	8	9	2	5	7	6	4	3	1	3	2	5	3	2	69								L/S	0.0337	0.0392	0.0276	0.0335
	1	7	6	8	3	5	5	7	2	5	6	3	3	1	7	4	73								T/S	0.0074	0.0118	0.0132	0.0108
																Mean	61.5
	①The blood cell counts of male argus snakehead																Sum		♂Mean	Mean×5	(104/mm3)		SD			①		②		③		Mean
	0	2	9	2	4	3	1	4	2	1	0	3	3	4	2	5	45	①	63	315		3.15	0.244949		Erythrocytes	294.37		315.909		277.617		295.965
	4	3	5	2	6	5	7	3	8	3	6	2	2	3	4	4	67	②	57	285		2.85	3.15		Leukocytes	8.7945		9.438		8.294		8.84217
	2	3	5	4	4	2	2	3	2	3	3	4	3	2	2	4	48	③	69	345		3.45			Thrombocytes	4.33575		4.653		4.089		4.35925
	1	4	6	7	3	4	6	2	9	5	4	3	4	7	6	8	79		①	②	③	Mean	SD		♀104/mm3	61.5*5=307.5		65*5=330		58*5=290
	3	3	1	5	4	1	4	5	3	4	1	5	5	5	3	5	57	Erythrocytes	3.01	2.72	3.3	3.01	0.236784		♂104/mm3	63*5=315		57*5=285		69*5=345
	5	6	2	8	4	2	3	5	2	4	3	8	9	4	3	2	70	Leukocytes	10.55	9.55	11.56	10.5533	0.820582		Erythrocytes	301.046		272.375		329.716		301.046
	1	5	3	2	5	4	6	2	1	2	7	1	4	3	5	6	57	Thrombocytes	3.4	3.08	3.73	3.40333	0.265372		Leukocytes	10.5525		9.5475		11.5575		10.5525
	6	3	2	2	5	6	0	2	3	6	1	6	3	5	7	8	65								Thrombocytes	3.402		3.078		3.726		3.402
	2	4	5	1	7	6	5	3	4	8	7	4	5	3	2	8	74
	3	5	7	6	2	5	4	1	3	6	5	6	1	7	5	2	68
																Mean	63
	②The blood cell counts of female argus snakehead																Sum
	1	3	3	4	1	2	6	3	3	4	5	2	5	1	4	2	49
	3	5	4	2	5	4	5	4	7	6	7	5	8	2	3	3	73
	4	2	4	3	2	5	1	4	3	4	5	6	5	6	8	1	63
	2	5	4	6	2	3	5	1	3	4	2	5	6	5	3	5	61
	5	4	2	6	3	2	5	6	4	5	3	7	6	4	2	4	68
	4	5	3	5	3	4	5	7	6	3	4	5	7	3	5	3	72
	6	4	2	5	4	5	3	6	3	4	8	2	6	5	2	1	66
	3	4	4	3	1	5	4	5	4	7	2	3	1	2	5	3	56
	2	7	5	8	3	4	6	5	6	7	4	5	4	3	3	5	77
	1	6	8	6	4	3	3	2	4	3	5	3	4	6	2	5	65
																Mean	65
	②The blood cell counts of male argus snakehead																Sum
	3	5	4	5	1	4	5	6	1	2	4	5	1	3	3	4	56
	3	6	2	3	7	3	6	5	7	4	2	3	1	2	1	3	58
	1	4	3	2	3	4	0	7	5	2	2	1	0	3	4	5	46
	4	2	5	4	4	2	5	3	8	6	1	2	3	5	4	2	60
	6	1	4	3	1	5	4	2	2	5	0	4	2	3	1	6	49
	2	3	1	6	5	3	4	5	1	7	2	5	7	5	2	3	61
	5	3	4	4	2	6	5	1	4	0	5	6	1	4	8	7	65
	4	5	3	6	3	4	3	0	6	2	3	7	4	2	3	9	64
	1	5	6	7	4	3	4	2	5	3	4	1	0	1	6	3	55
	2	4	5	5	1	4	2	3	4	2	7	2	5	0	4	6	56
																Mean	57
	③The blood cell counts of female argus snakehead																Sum
	4	5	2	1	3	4	4	1	3	5	2	4	3	1	3	3	48
	1	1	5	6	3	1	5	0	8	4	3	8	4	3	4	1	57
	4	1	2	3	4	2	2	4	3	3	5	7	5	6	3	2	56
	5	5	3	4	6	3	1	2	5	4	6	2	3	3	5	4	61
	6	4	5	3	5	2	5	5	4	1	4	3	6	4	2	1	60
	2	2	8	5	7	1	2	3	6	4	3	1	4	3	5	6	62
	3	7	2	4	2	5	8	9	3	7	2	0	3	6	2	5	68
	5	2	5	3	1	3	6	5	4	5	1	4	2	5	3	4	58
	4	5	6	7	3	4	5	4	1	4	2	1	3	4	5	3	61
	2	0	1	3	5	2	4	6	3	2	3	4	1	2	6	5	49
																Mean	58
	③The blood cell counts of male argus snakehead																Sum
	5	4	6	3	5	2	0	6	3	7	5	4	2	3	5	5	65
	1	2	4	5	7	3	6	3	4	5	7	8	0	1	3	2	61
	3	5	6	5	3	4	6	7	5	4	6	2	5	4	3	5	73
	2	5	7	3	4	8	5	3	7	6	5	2	3	5	4	3	72
	4	7	2	2	1	3	3	4	5	7	3	3	4	2	7	6	63
	7	4	3	4	0	4	2	6	1	5	5	6	5	6	5	4	67
	2	3	8	5	3	5	7	4	4	3	8	2	3	7	3	6	73
	3	1	7	6	2	4	5	0	2	8	5	4	4	8	6	6	71
	4	6	2	3	8	3	2	5	6	9	6	2	2	4	4	7	73
	1	3	4	5	1	6	5	3	5	7	8	3	2	3	7	9	72
																Mean	69
