# Supplementary material for: Hematological and cytochemical characteristics of peripheral blood cells in the argus snakehead (Ophiocephalus argus Cantor)
Source: PeerJ. 2021 Apr 26;9:e11234. doi: 10.7717/peerj.11234 (PMC8083180; doi:10.7717/peerj.11234)
Supplement: File S4 — The Hb, HCT, ESR, MCV, MCH, and MCHC values of individual female and male argus snakehead specimens were measured in triplicate. The mean value was taken after three experiments and the standard deviation was calculated. [file peerj-09-11234-s004.xlsx]

## Sheet: Sheet1
♀(1)	①	②	③	Mean	SD
HGB(g/dl)	11	9	10.5	10.1667	0.849837	10.5333
HCT(%)	42.86	40.82	43.88	42.52	1.27216	0.366161
ESR(mm/h)	1.21	1.34	1.15	1.23333	0.0793025
♀(2)	①	②	③
HGB	9.5	10.7	11	10.4	0.648074	42.4144
HCT	41.96	45	48.86	45.2733	2.82354	2.37854
ESR	1.07	2.44	1.78	1.76333	0.559424
♀(3)	①	②	③
HGB	11.5	10.6	11	11.0333	0.368179	1.51556
HCT	40.08	35.82	42.45	39.45	2.7431	0.217738
ESR	1.35	2.03	1.27	1.55	0.340979
♂(1)	①	②	③	Mean	SD
HGB	10.4	9.7	10.8	10.3	0.454606	10.6
HCT	45.78	43.24	47.96	45.66	1.9288	0.294392
ESR	1.37	1.45	1.48	1.43333	0.046428
♂(2)	①	②	③
HGB	11.3	10.8	10.9	11	0.216025	43.2133
HCT	41.47	45.61	40.29	42.4567	2.28119	1.77152
ESR	1.4	1.35	1.5	1.41667	0.062361
♂(3)	①	②	③
HGB	10.7	10.5	10.3	10.5	0.163299	1.49222
HCT	41.02	43.35	40.2	41.5233	1.33432	0.0953098
ESR	2.15	1.53	1.2	1.62667	0.393813
♀	①	②	③	④	⑤	Mean	SD
MCV	143.65	152.95	133.28	162.85	124.84	143.514	13.538
MCH	34.35	35.14	37.27	39.69	32.17	35.724	2.56823
MCHC	23.65	23.11	24.63	29.44	21.95	24.556	2.59083
♂	①	②	③	④	⑤	Mean	SD
MCV	151.69	141.05	137.87	167.87	125.83	144.862	14.1536
MCH	34.22	36.54	34.88	40.44	31.21	35.458	3.02996
MCHC	22.39	26.19	25	27.56	22.5	24.728	2.03282
