# Supplementary material for: Hematological and cytochemical characteristics of peripheral blood cells in the argus snakehead (Ophiocephalus argus Cantor)
Source: PeerJ. 2021 Apr 26;9:e11234. doi: 10.7717/peerj.11234 (PMC8083180; doi:10.7717/peerj.11234)
Supplement: File S5 — The CV values of female and male argus snakehead specimens were measured ten times. The mean value was taken after ten experiments, and the standard deviation was calculated. [file peerj-09-11234-s005.xlsx]

## Sheet: Sheet1
①The total blood cell counts of female argus snakehead																Sum	Sum×5		①The total blood cell counts of male argus snakehead																Sum	Sum×5
2	4	3	3	2	3	7	2	2	3	4	2	1	0	2	1	41	(104/mm3)	(106/mm3)	0	2	9	2	4	3	1	4	2	1	0	3	3	4	2	5	45	(104/mm3)	(106/mm3)
5	4	3	1	4	5	6	5	9	5	5	4	3	4	2	3	68			4	3	5	2	6	5	7	3	8	3	6	2	2	3	4	4	67
3	3	1	5	1	3	3	2	5	4	2	8	4	7	6	3	60			2	3	5	4	4	2	2	3	2	3	3	4	3	2	2	4	48
2	3	2	1	1	0	3	0	1	2	3	5	7	2	2	6	40			1	4	6	7	3	4	6	2	9	5	4	3	4	7	6	8	79
4	2	3	7	5	3	6	4	1	3	2	6	8	3	1	2	60			3	3	1	5	4	1	4	5	3	4	1	5	5	5	3	5	57
															Mean	53.8	269	2.69																Mean	59.2	296	2.96
②The total blood cell counts of female argus snakehead																Sum			②The total blood cell counts of male argus snakehead																Sum
3	4	2	1	6	5	3	8	7	2	1	0	6	5	2	4	59			5	6	2	8	4	2	3	5	2	4	3	8	9	4	3	2	70
7	2	1	6	3	4	2	8	1	5	6	3	5	4	3	2	62			1	5	3	2	5	4	6	2	1	2	7	1	4	3	5	6	57
6	3	4	2	4	7	8	6	3	6	5	5	4	6	7	7	83			6	3	2	2	5	6	0	2	3	6	1	6	3	5	7	8	65
3	6	8	9	2	5	7	6	4	3	1	3	2	5	3	2	69			2	4	5	1	7	6	5	3	4	8	7	4	5	3	2	8	74
1	7	6	8	3	5	5	7	2	5	6	3	3	1	7	4	73			3	5	7	6	2	5	4	1	3	6	5	6	1	7	5	2	68
															Mean	69.2	346	3.46																Mean	66.8	334	3.34
③The total blood cell counts of female argus snakehead																Sum			③The total blood cell counts of male argus snakehead																Sum
1	3	3	4	1	2	6	3	3	4	5	2	5	1	4	2	49			3	5	4	5	1	4	5	6	1	2	4	5	1	3	3	4	56
3	5	4	2	5	4	5	4	7	6	7	5	8	2	3	3	73			3	6	2	3	7	3	6	5	7	4	2	3	1	2	1	3	58
4	2	4	3	2	5	1	4	3	4	5	6	5	6	8	1	63			1	4	3	2	3	4	0	7	5	2	2	1	0	3	4	5	46
2	5	4	6	2	3	5	1	3	4	2	5	6	5	3	5	61			4	2	5	4	4	2	5	3	8	6	1	2	3	5	4	2	60
5	4	2	6	3	2	5	6	4	5	3	7	6	4	2	4	68			6	1	4	3	1	5	4	2	2	5	0	4	2	3	1	6	49
															Mean	62.8	314	3.14																Mean	53.8	269	2.69
④The total blood cell counts of female argus snakehead																Sum			④The total blood cell counts of male argus snakehead																Sum
4	5	3	5	3	4	5	7	6	3	4	5	7	3	5	3	72			2	3	1	6	5	3	4	5	1	7	2	5	7	5	2	3	61
6	4	2	5	4	5	3	6	3	4	8	2	6	5	2	1	66			5	3	4	4	2	6	5	1	4	0	5	6	1	4	8	7	65
3	4	4	3	1	5	4	5	4	7	2	3	1	2	5	3	56			4	5	3	6	3	4	3	0	6	2	3	7	4	2	3	9	64
2	7	5	8	3	4	6	5	6	7	4	5	4	3	3	5	77			1	5	6	7	4	3	4	2	5	3	4	1	0	1	6	3	55
1	6	8	6	4	3	3	2	4	3	5	3	4	6	2	5	65			2	4	5	5	1	4	2	3	4	2	7	2	5	0	4	6	56
															Mean	67.2	336	3.36																Mean	60.2	301	3.01
⑤The total blood cell counts of female argus snakehead																Sum			⑤The total blood cell counts of male argus snakehead																Sum
4	5	2	1	3	4	4	1	3	5	2	4	3	1	3	3	48			5	4	6	3	5	2	0	6	3	7	5	4	2	3	5	5	65
1	1	5	6	3	1	5	0	8	4	3	8	4	3	4	1	57			1	2	4	5	7	3	6	3	4	5	7	8	0	1	3	2	61
4	1	2	3	4	2	2	4	3	3	5	7	5	6	3	2	56			3	5	6	5	3	4	6	7	5	4	6	2	5	4	3	5	73
5	5	3	4	6	3	1	2	5	4	6	2	3	3	5	4	61			2	5	7	3	4	8	5	3	7	6	5	2	3	5	4	3	72
6	4	5	3	5	2	5	5	4	1	4	3	6	4	2	1	60			4	7	2	2	1	3	3	4	5	7	3	3	4	2	7	6	63
															Mean	56.4	282	2.82																Mean	66.8	334	3.34
⑥The total blood cell counts of female argus snakehead																Sum			⑥The total blood cell counts of male argus snakehead																Sum
2	2	8	5	7	1	2	3	6	4	3	1	4	3	5	6	62			7	4	3	4	0	4	2	6	1	5	5	6	5	6	5	4	67
3	7	2	4	2	5	8	9	3	7	2	0	3	6	2	5	68			2	3	8	5	3	5	7	4	4	3	8	2	3	7	3	6	73
5	2	5	3	1	3	6	5	4	5	1	4	2	5	3	4	58			3	1	7	6	2	4	5	0	2	8	5	4	4	8	6	6	71
4	5	6	7	3	4	5	4	1	4	2	1	3	4	5	3	61			4	6	2	3	8	3	2	5	6	9	6	2	2	4	4	7	73
2	0	1	3	5	2	4	6	3	2	3	4	1	2	6	5	49			1	3	4	5	1	6	5	3	5	7	8	3	2	3	7	9	72
															Mean	59.6	298	2.98																Mean	71.2	356	3.56
⑦The blood cell counts of female argus snakehead																Sum			⑦The total blood cell counts of male argus snakehead																Sum
2	1	4	5	3	7	2	4	5	8	1	3	6	2	1	0	54			4	2	1	3	5	2	6	3	4	1	5	7	2	1	0	3	49
4	6	1	3	2	5	6	1	8	3	4	2	7	1	4	2	59			6	4	3	2	5	1	3	4	5	7	1	4	5	1	2	4	57
3	1	5	4	6	2	7	3	1	2	6	4	3	5	2	8	62			3	2	1	5	4	2	7	3	8	5	3	2	7	5	6	2	65
3	2	5	2	4	5	3	9	4	6	3	6	7	1	2	5	67			5	3	4	1	5	3	2	5	7	3	4	6	2	4	3	1	58
1	5	3	4	5	3	6	3	8	2	4	7	8	3	4	1	67			2	7	3	4	2	6	3	8	4	6	2	3	1	2	5	7	65
															Mean	61.8	309	3.09																Mean	58.8	294	2.94
⑧The total blood cell counts of female argus snakehead																Sum			⑧The total blood cell counts of male argus snakehead																Sum
2	3	4	1	5	2	6	2	3	5	7	3	4	1	6	2	56			3	5	2	7	4	2	1	3	4	5	1	6	4	3	2	5	57
5	3	7	6	2	8	1	2	5	7	6	1	3	4	5	0	65			5	4	3	1	6	5	2	3	1	4	0	5	2	3	7	9	60
4	1	2	5	3	6	2	7	3	5	7	6	8	3	2	6	70			7	2	1	8	5	3	1	2	4	5	6	3	2	1	5	7	62
3	4	6	7	5	2	3	2	4	8	1	2	3	6	4	2	62			2	3	5	4	3	6	2	1	7	5	6	7	4	3	5	4	67
2	3	5	8	7	2	6	5	3	1	2	3	2	5	1	3	58			4	2	1	6	5	3	4	5	1	3	5	4	6	4	3	8	64
															Mean	62.2	311	3.11																Mean	62	310	3.1
⑨The total blood cell counts of female argus snakehead																Sum			⑨The total blood cell counts of male argus snakehead																Sum
3	2	1	4	5	8	6	2	7	3	4	1	2	4	5	1	58			8	2	1	5	3	4	7	5	6	2	3	2	4	5	2	6	65
2	3	6	7	5	2	3	1	9	2	5	6	4	8	3	2	68			3	4	6	7	5	2	4	9	3	6	1	2	3	5	4	3	67
5	3	4	6	3	7	5	2	3	8	6	3	2	5	1	3	66			6	2	4	3	2	5	2	4	5	2	4	3	2	6	2	4	56
6	2	8	3	5	1	2	3	6	2	7	5	3	1	0	8	62			5	4	2	1	5	6	4	2	7	4	5	0	9	2	3	6	65
1	3	4	5	2	3	5	6	2	3	5	6	5	3	2	6	61			2	5	3	7	2	4	5	2	6	4	8	6	3	5	4	7	73
															Mean	63	315	3.15																Mean	65.2	326	3.26
⑩The total blood cell counts of female argus snakehead																Sum			⑩The total blood cell counts of male argus snakehead																Sum
5	3	4	6	2	8	3	1	6	5	7	2	3	7	5	5	72			6	3	2	5	8	1	3	7	2	5	4	3	2	5	6	2	64
2	1	3	5	4	3	2	5	6	1	9	4	2	5	7	0	59			4	2	3	6	5	4	3	2	9	0	7	4	5	2	4	5	65
1	5	6	4	2	1	3	2	5	6	3	2	1	6	3	2	52			5	2	4	3	7	2	6	3	4	7	3	2	5	6	7	4	70
3	6	5	4	1	2	3	6	5	3	1	6	7	5	3	6	66			2	3	1	8	5	7	6	3	4	8	4	5	3	2	1	6	68
7	2	3	1	8	5	6	2	3	5	2	1	3	6	5	2	61			2	6	3	4	5	2	3	4	6	2	3	7	4	1	5	6	63
															Mean	62	310	3.1																Mean	66	330	3.3
																Mean		3.09																	Mean		3.15
																SD		0.214802																	SD		0.242652
																CV(♀)		0.0695153																	CV(♂)		0.0770324
